# Supplementary material for: Gendered social ideals and empowerment: investigating the intersection of gender and ethnicity among ethnic minorities in Northern Vietnam
Source: Research Square preprint supplement (doi:10.21203/rs.3.rs-6917499/v1), 2025-08-18
Supplement: Supplementary file 1 [file 5eeb019c379d8218ba1e935b.docx]

**Appendix 1: Sample output of seasonality discussio**

***Legends***:

X Joining the decision-making process related to this activity

X Doing the task

XX Working harder than the other gender

| **Date:4/8/2022** | | **Village: Tong Tai B** | | **Facilitator: Chau Thi Sua** | | | | | | **□ Lunar calendar        ☒ Solar calendar** | | | | | |  | |
| --- | --- | --- | --- | --- | --- | --- | --- | --- | --- | --- | --- | --- | --- | --- | --- | --- | --- |
| **Month** | | **Jan** | **Feb** | **Mar** | **Apr** | **May** | **Jun** | **Jul** | **Aug** | | **Sep** | **Oct** | **Nov** | **Dec** | **Note** | |
| Main climate pattern | 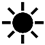 | . |  | X | X | X | X | X | X | |  |  |  |  |  | |
| 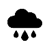 |  |  |  |  |  | X | X |  | |  |  |  |  |  | |
| 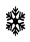 | X | X |  |  |  |  |  |  | |  |  | X | X |  | |
| 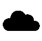 |  |  | X | X |  |  |  | X | | X | X |  |  |  | |
| Sugarcane | Activities | - Weeding - Ditch drain - Plant - Harvest | - Plant - Harvest | - Plant - Harvest | - Plant - Harvest | - Harvest | - Weed - Apply pesticide | - Weed - Apply pesticide |  | | - Weed - Apply pesticide |  |  | - Harvest |  | |
| Male | - XX - XXX - XX - XX | - XX - XX | - XX - XX | - XX - XX | - XX | - XX - XX | - XX - XX |  | | - XX - XX |  |  | - XX |  | |
| Female | - XX - XX - XX | - XX - XX | - XX - XX | - XX - XX | - XX | - XX - X | - XX - X |  | | - XX - X |  |  | - XX |  | |
| Corn | Activities |  |  | - Weed | - Weed - Plant | - Plant - Apply fertilizer |  | - Apply fertilizer | - Apply fertilizer | |  | - Harvest - Sell | - Harvest - Sell |  |  | |
| Male |  |  | - XX | - XX - XX | - XX - XX |  | - XX | - XX | |  | - X - XX | - X - XX |  |  | |
| Female |  |  | - XX | - XX - XX | - XX - XX |  | - XX | - XX | |  | - XX - X | - XX - X |  |  | |
| Cassava | Activities | - Weed - Harvest - Sell | - Weed - Plant - Harvest - Sell | - Weed - Plant - Harvest - Sell | - Weed |  | - Apply fertilizer | - Apply fertilizer | - Apply fertilizer | |  |  |  | - Harvest - Sell |  | |
| Male | - XX - XX - X | - XX - XX - XX - XX | - XX - XX - XX - XX | - XX |  | - XX | - XX | - XX | |  |  |  | - XX - XX |  | |
| Female | - XXX - XX | - XX - XX - XX | - XXX - XX - XX | - XXX |  | - XXX | - XXX | - XXX | |  |  |  | - XX |  | |
| Wage employment | Activities |  |  |  |  |  |  |  |  | |  |  |  |  |  | |
| Male |  |  |  |  |  |  |  |  | |  |  |  |  |  | |
| Female | XX | XX | XX | XX | XX |  | XX | XX | | XX | XX | XX |  |  | |
| Growing vegetables | Activities |  |  |  |  |  |  |  |  | |  |  |  |  |  | |
| Male |  |  |  |  |  |  |  |  | |  |  |  |  |  | |
| Female | XX | XX | XX | XX | XX | XX | XX | XX | | XX | XX | XX |  |  | |
| Household chores | Activities |  |  |  |  |  |  |  |  | |  |  |  |  |  | |
| Male |  |  |  |  |  |  |  |  | |  |  |  |  |  | |
| Female | XX | XX | XX | XX | XX | XX | XX | XX | | XX | XX | XX |  |  | |
| Buffalos | Activities |  |  |  |  |  |  |  |  | |  |  |  |  |  | |
| Male | XXX | XXX | XXX | XXX | XXX | XXX | XXX | XXX | | XXX | XXX | XXX | XXX |  | |
| Female | X | X | X | X | X | X | X | X | | X | X | X | X |  | |
| The busy and free time pattern of villagers (both genders) | | Busy | Busy | Busy | Busy | Busy | Busy | Free | Free | | Free | Busy | Busy | Busy |  | |

Note: For the livelihoods with many activities, the level of participation of men and women corresponds with the order of the activity. The empty bullet point indicates that this gender does not take part in this activity.

**Appendix 2: Comparisons of gender roles between three ethnicities over different domains**

| **Domains** | **Thai** | **H’Mong** | **Dao** |
| --- | --- | --- | --- |
| Decisions on production and household work | Men and women discuss important decisions, but men have the final say.  Women can make decisions independently over their traditional domains without consulting their husbands. | | | |
| - Men are content with the current arrangement - Women, in general, believe the current arrangement is fair because they feel respected, or to keep family harmony. However, some want to have the final say because they are not happy with men’s decisions | - Men accept the current arrangement because they believe women cannot make a meaningful contribution   - Some criticize that women are too passive, which means them have to carry too many responsibilities - Women express mixed opinions   - Agree with men   - Desire for change: being asked and heard more, although they do not wish to have the final say | | |
| Workload division | - Women and men carry out the farm work together. While men are responsible for heavier tasks or those involving machinery, women are responsible for lighter work. Beyond farming, they manage traditional domestic duties. Yet men will handle cooking involving large quantities that require significant physical force, especially during communal events. | | | |
| - Men believe the current division is fair - Women express mixed opinions   - Some agree with men   - Some think men should do more household chores | | | |
| Decision on spending and income | - Men discuss major expenditures with their wives but retain the final say - Both men and women can keep their own income. However, when the earnings are substantial, they must contribute to a common account - Both men and women can manage the account, depending on family’s arrangement | | | |
| - Women are more likely to keep the common account - Women have a higher chance of working with traders to sell their agricultural produce, thus having their own income - Don’t need to ask husbands for approval for petty spending | - Women are more likely to keep the common account - Women have less chance to work with traders than Thai women to sell their agricultural products, due to restricted mobility and lack of fluency in Vietnamese - Less likely (than H’Mong women) to ask husbands for approval for petty spending | - Men are more likely to keep the common account - Women have less chance to work with traders than Thai women to sell their agricultural products, due to restricted mobility and lack of fluency in Vietnamese - Have to ask husbands for approval for petty spending |
|  | - Both men and women are satisfied with the current arrangements | | - Men find this current arrangement acceptable, as they believe women lack of ability to trade - Women express mixed opinions   - Agree with men   - Desire for change as they believe families with women’s financial control will be better off |
| Women’s mobility | - Women can travel anywhere they wish within a day without asking for their husband’s permission - High motorbike ownership and driving capability - It is socially accepted to share a ride with another woman, and sharing a ride with men is discouraged but acceptable in some special cases | - Women can travel anywhere within the day, but have to ask for their husbands’ permission if they travel outside the village (which is normally discouraged) - Less motorbike ownership and less likely to have driving capability - It is socially accepted to share a ride with another woman, and sharing a ride with men is discouraged but acceptable in some special cases | - Women have to ask for their husbands’ permission to travel anywhere - Less motorbike ownership and less likely to have driving capability - It is socially accepted to share a ride with another woman, and it is almost forbidden to share a ride with men |
